# Supplementary material for: An Inducible ESCRT-III Inhibition Tool to Control HIV-1 Budding
Source: MDPI journal article supplement (doi:10.3390/v15122289), 2023-11-22
Supplement: s1 [file s1]

**Table S1: Summary of CHMP fusion protein sequence**

| Construct name                      | Sequence                                                                             |
|-------------------------------------|--------------------------------------------------------------------------------------|
| CHMP2A-NS3                          | CHMP2A(1-222)-xxxx-DEMEECSQHL-xx-NS3/4A(1-197)-xx-Flag                               |
| CHMP3 -NS3                          | CHMP3 (1-222)-xxxx-DEMEECSQHL-xx-NS3/4A(1-197)-xx-Flag                               |
| CHMP4B-NS3                          | CHMP4B(1-224)-xxxx-DEMEECSQHL-xx-NS3/4A(1-197)-xx-Flag                               |
| CHMP2A-NS3-blue                     | CHMP2A(1-222)-xxxx-DEMEECSQHL-xx-NS3/4A(1-197)-xx-Flag-xxxx-mTurquoise(1-238)        |
| CHMP3 -NS3-blue                     | CHMP3 (1-222)-xxxx-DEMEECSQHL-xx-NS3/4A(1-197)-xx-Flag-xxxx-mTurquoise(1-238)        |
| CHMP4B-NS3-blue                     | CHMP4B(1-224)-xxxx-DEMEECSQHL-xx-NS3/4A(1-197)-xx-Flag-xxxx-mTurquoise(1-238)        |
| CHMP2A-NS3-green                    | CHMP2A(1-222)-xxxx-DEMEECSQHL-xx-NS3/4A(1-197)-xx-Flag-xx-mNeonGreen(1-236)          |
| CHMP3 -NS3-green                    | CHMP3 (1-222)-xxxx-DEMEECSQHL-xx-NS3/4A(1-197)-xx-Flag-xx-mNeonGreen(1-236)          |
| CHMP4B-NS3-green                    | CHMP4B(1-224)-xxxx-DEMEECSQHL-xx-NS3/4A(1-197)-xx-Flag-xx-mNeonGreen(1-236)          |
| CHMP2A-NS3mut-green                 | CHMP2A(1-222)-xxxx- <b>GSMGSGSQHL</b> -xx-NS3/4A(1-197)-xx-Flag-xx-mNeonGreen(1-236) |
| CHMP3 -NS3mut-green                 | CHMP3 (1-222)-xxxx- <b>GSMGSGSQHL</b> -xx-NS3/4A(1-197)-xx-Flag-xx-mNeonGreen(1-236) |
| CHMP4B-NS3-green                    | CHMP4B(1-224)-xxxx- <b>GSMGSGSQHL</b> -xx-NS3/4A(1-197)-xx-Flag-xx-mNeonGreen(1-236) |
| xxxx represents linker amino acids. |                                                                                      |
